# Supplementary material for: (−)-Epicatechin-Enriched Extract from Camellia sinensis Improves Regulation of Muscle Mass and Function: Results from a Randomized Controlled Trial
Source: MDPI journal article supplement (doi:10.3390/antiox10071026), 2021-06-25
Supplement: s1 [file s1]

Supplementary 1. Description of the placebo and treatment products

|                             |                                          | Placebo product | Treatment product |
|-----------------------------|------------------------------------------|-----------------|-------------------|
| Ingredients and content (%) | Tannase-treated green tea extract        | -               | 83.30             |
|                             | Cyclodextrin                             | 16.60           | 16.65             |
|                             | Magnesium stearate                       | 0.05            | 0.05              |
|                             | Microcrystalline cellulose               | 83.30           | -                 |
|                             | Caramel color                            | 0.05            | -                 |
| Features                    | Brown capsule                            |                 |                   |
| Packing                     | One capsule (360 mg) individually packed |                 |                   |

Supplementary 2. Effects of tannase-treated green tea extract on biochemical variables

|                  | Control group (n=34) |                |                 | Treatment group (n=33) |                |                 | <i>p</i> -value |
|------------------|----------------------|----------------|-----------------|------------------------|----------------|-----------------|-----------------|
|                  | Baseline             | 12 weeks       | <i>p</i> -value | Baseline               | 12 weeks       | <i>p</i> -value |                 |
| hs-CRP (mg/L)    | 1.32 ± 4.64          | 0.78 ± 1.64    | 0.486           | 0.94 ± 1.71            | 1.63 ± 4.84    | 0.384           | 0.266           |
| IL-6 (pg/mL)     | 2.23 ± 2.19          | 2.07 ± 1.88    | 0.378           | 1.88 ± 1.80            | 1.48 ± 0.69    | 0.200           | 0.490           |
| IL-8 (pg/mL)     | 18.75 ± 10.51        | 19.44 ± 12.40  | 0.529           | 14.88 ± 3.66           | 15.65 ± 4.99   | 0.273           | 0.951           |
| IGF-1 (ng/mL)    | 148.30 ± 42.12       | 150.73 ± 45.62 | 0.715           | 157.34 ± 41.30         | 156.94 ± 38.41 | 0.935           | 0.728           |
| Cortisol (µg/dL) | 0.13 ± 0.06          | 0.15 ± 0.06    | 0.152           | 0.16 ± 0.07            | 0.17 ± 0.11    | 0.566           | 0.823           |

Values are presented as mean ± standard deviation. *p*-values were measured by an independent t-test

Supplementary 3. Effects of tannase-treated green tea extract on safety parameters

|                                 | Control group (n=40) |                |                               | Treatment group (n=40) |                |                               | <i>p</i> -value <sup>2)</sup> |
|---------------------------------|----------------------|----------------|-------------------------------|------------------------|----------------|-------------------------------|-------------------------------|
|                                 | Baseline             | 12 weeks       | <i>p</i> -value <sup>1)</sup> | Baseline               | 12 weeks       | <i>p</i> -value <sup>1)</sup> |                               |
| WBC (×10 <sup>3</sup> /μL)      | 5.67 ± 1.22          | 5.35 ± 0.9     | 0.018                         | 5.89 ± 1.25            | 5.41 ± 1.15    | 0.001                         | 0.396                         |
| RBC (×100 <sup>3</sup> /μL)     | 4.38 ± 0.38          | 4.39 ± 0.35    | 0.819                         | 4.58 ± 0.37            | 4.67 ± 0.36    | 0.328                         | 0.706                         |
| Hemoglobin (g/dL)               | 13.47 ± 1.01         | 13.57 ± 1.04   | 0.372                         | 13.81 ± 1.06           | 13.90 ± 1.10   | 0.284                         | 0.943                         |
| Hematocrit (%)                  | 39.98 ± 3.07         | 40.28 ± 2.91   | 0.407                         | 40.85 ± 2.96           | 41.28 ± 2.98   | 0.095                         | 0.752                         |
| Platelet (×10 <sup>3</sup> /μL) | 238.25 ± 52.12       | 245.38 ± 51.14 | 0.094                         | 243.10 ± 45.71         | 248.18 ± 46.25 | 0.208                         | 0.722                         |
| ALP (IU/L)                      | 64.73 ± 18.43        | 66.30 ± 19.70  | 0.287                         | 75.83 ± 15.67          | 76.48 ± 18.80  | 0.643                         | 0.648                         |
| Gamma-GT (IU/L)                 | 18.98 ± 16.35        | 20.40 ± 17.07  | 0.404                         | 21.33 ± 13.06          | 21.43 ± 12.52  | 0.926                         | 0.510                         |
| AST (IU/L)                      | 26.53 ± 6.30         | 27.15 ± 7.66   | 0.540                         | 26.20 ± 8.02           | 25.70 ± 8.63   | 0.763                         | 0.562                         |
| ALT (IU/L)                      | 26.58 ± 10.37        | 26.48 ± 10.32  | 0.939                         | 26.30 ± 14.40          | 23.90 ± 8.94   | 0.322                         | 0.401                         |
| Total bilirubin (mg/dL)         | 0.85 ± 0.29          | 0.80 ± 0.23    | 0.187                         | 0.89 ± 0.36            | 0.87 ± 0.44    | 0.490                         | 0.694                         |
| Total protein (g/dL)            | 7.29 ± 0.33          | 7.22 ± 0.30    | 0.140                         | 7.27 ± 0.38            | 7.32 ± 0.36    | 0.348                         | 0.085                         |
| Albumin (g/dL)                  | 4.43 ± 0.22          | 4.41 ± 0.22    | 0.402                         | 4.45 ± 0.20            | 4.48 ± 0.18    | 0.242                         | 0.161                         |
| BUN (mg/dL)                     | 14.48 ± 3.43         | 15.10 ± 3.79   | 0.298                         | 15.95 ± 4.80           | 15.65 ± 4.23   | 0.580                         | 0.246                         |
| Creatinine (mg/dL)              | 0.69 ± 0.12          | 0.69 ± 0.14    | 0.536                         | 0.66 ± 0.17            | 0.69 ± 0.15    | 0.262                         | 0.201                         |

|                  |                |                |       |                |                |       |       |
|------------------|----------------|----------------|-------|----------------|----------------|-------|-------|
| Glucose (mg/dL)  | 90.93 ± 8.48   | 88.85 ± 8.84   | 0.082 | 92.73 ± 7.45   | 90.25 ± 8.70   | 0.069 | 0.821 |
| CK (IU/L)        | 115.10 ± 57.58 | 109.20 ± 44.98 | 0.401 | 101.23 ± 44.22 | 117.18 ± 52.91 | 0.315 | 0.208 |
| LD (IU/L)        | 420.73 ± 72.99 | 418.90 ± 77.68 | 0.835 | 393.45 ± 69.81 | 400.80 ± 54.38 | 0.323 | 0.423 |
| SG (1.005~1.030) | 1.02 ± 0.01    | 1.02 ± 0.01    | 0.941 | 1.02 ± 0.01    | 1.02 ± 0.01    | 0.967 | 0.937 |
| pH (4.5~9.0)     | 6.19 ± 0.78    | 6.18 ± 0.81    | 0.936 | 6.21 ± 0.91    | 6.13 ± 0.94    | 0.531 | 0.719 |

---

Values are presented as mean ± standard deviation.

<sup>1)</sup> *p*-value was measured by a paired t-test

<sup>2)</sup> *p*-value was measured by an independent t-test
